# Supplementary material
Source: PubMed Central journal article supplement (PMC2904523)
Supplement: NIHMS212898-supplement-1_si_001.pdf [file NIHMS212898-supplement-1_si_001.pdf]

## Supporting Information

# Diarylaniline Derivatives as a Novel Class of HIV-1 Non-nucleoside Reverse Transcriptase Inhibitors

Bingjie Qin,<sup>†</sup> Xingkai Jiang,<sup>†</sup> Hong Lu,<sup>§</sup> Xingtao Tian,<sup>†</sup> Florent Barbault,<sup>⊥</sup> Li  
Huang,<sup>||</sup> Keduo Qian,<sup>‡</sup> Chin-Ho Chen,<sup>||</sup> Rong Huang,<sup>‡</sup> Shibo Jiang,<sup>§</sup> Kuo-Hsiung  
Lee,<sup>‡</sup> and Lan Xie<sup>†,\*</sup>

<sup>†</sup>*Beijing Institute of Pharmacology and Toxicology, 27 Taiping Road, Beijing, 100850, China.*

<sup>‡</sup>*Natural Products Research Laboratories, University of North Carolina, Chapel Hill, NC 27599,  
US.*

<sup>§</sup>*Lindsley F. Kimball Research Institute, New York Blood Center, New York, NY 10065, US.*

<sup>⊥</sup>*ITODYS, Université Paris Diderot - CNRS UMR 7086, 15 rue Jean de Baïf, 75205 Paris,  
France.*

<sup>||</sup>*Duke University Medical Center, Box 2926, Surgical Oncology Research Facility, Durham, NC  
27710, US.*

### Contents.

1. HPLC conditions and summary of HPLC purity data for final compounds

HPLC analyses for purity were performed using a Grace Alltima HP C18 column (100 × 2.1 mm, 3 μm) eluting with a mixture of solvents A and B, UV wavelength, maximal absorbance at 254 nm; temperature, ambient; injection volume, 3 μL.

Condition 1: acetonitrile/water 80:20, flow rate 0.2 mL/min;

Condition 2: methanol/water 80:20, flow rate 0.2 mL/min.

### Summary of HPLC purity data for final compounds

| Code#           | HPLC-1               |          | HPLC-2               |          |
|-----------------|----------------------|----------|----------------------|----------|
|                 | Retention time (min) | Purity % | Retention time (min) | Purity % |
| 13              | 3.055                | 99.425   | 4.685                | 99.864   |
| 15              | 3.345                | 95.751   | 3.754                | 95.289   |
| 16              | 4.482                | 97.511   | 4.893                | 97.803   |
| 17              | 4.564                | 96.278   | 8.346                | 97.544   |
| 18              | 3.235                | 97.718   | 5.264                | 97.458   |
| 19              | 2.937                | 98.503   | 4.069                | 97.986   |
| 20              | 2.574                | 99.926   | 3.246                | 100.000  |
| 21              | 2.652                | 98.050   | 3.550                | 96.123   |
| 22              | 2.939                | 98.276   | 4.056                | 99.627   |
| 24              | 4.550                | 95.694   | 7.589                | 95.998   |
| 25              | 3.284                | 96.554   | 3.258                | 97.426   |
| 26              | 2.455                | 99.031   | 2.259                | 99.630   |
| 27              | 4.460                | 95.901   | 7.553                | 96.348   |
| 29              | 3.035                | 96.767   | 4.813                | 96.043   |
| 30              | 2.144                | 99.201   | 2.326                | 99.663   |
| 31              | 2.744                | 99.757   | 3.750                | 97.869   |
| 32              | 2.294                | 96.081   | 2.965                | 96.105   |
| 34 <sup>a</sup> | 3.983                | 100.00   | 3.270                | 99.529   |
| 35 <sup>a</sup> | 4.803                | 100.00   | 4.783                | 97.711   |
| 36              | 2.484                | 96.990   | 3.500                | 97.772   |
| 37              | 1.936                | 96.837   | 2.081                | 97.763   |
| 38              | 2.207                | 98.255   | 2.185                | 97.895   |
| 39 <sup>a</sup> | 5.415                | 95.967   | 4.725                | 97.088   |
| 40              | 2.518                | 97.615   | 3.490                | 97.924   |

<sup>a</sup> Agilent TC-C18 column (250 × 4.6 mm, 5 μm), flow rates: 1.0 mL/min (condition 1) and 1.0 mL/min (condition 2)
